# Supplementary material for: In silico analysis of the fucosylation-associated genome of the human blood fluke Schistosoma mansoni: cloning and characterization of the enzymes involved in GDP-L-fucose synthesis and Golgi import
Source: PubMed Central journal article supplement (PMC3718619; doi:10.1186/1756-3305-6-201), 2013-07-09
Supplement: 1756-3305-6-201-S1.pdf [file 1756-3305-6-201-S1.pdf]

**Supplementary Table S1. List of primers used in this study for RT-PCR, RACE, qPCR, and protein expression**

**A. Primers for RT-PCR confirmation of gene transcription**

| Gene | Forward primer                 | Reverse primer                  |
|------|--------------------------------|---------------------------------|
| GMD  | 5'-TTAGCTGCTCAGTCCCATGTGAAG-3' | 5'-CTCCGGTGTATCACGTTGAAGCAT-3'  |
| GMER | 5'-AGCGCATACGCCAACCTATGTAA-3'  | 5'-ACTGACGCAATGGCTTACCAGAAC-3'  |
| GFT  | 5'-CGTATGCAGCTCTGCTGTACCTAG-3' | 5'-CATGTGCAACAGCTGCATAAACTGC-3' |

**B. Primers for 5' and 3' RACE of gene transcripts**

| Gene | Forward primer (3' RACE)              | Reverse primer (5' RACE)            |
|------|---------------------------------------|-------------------------------------|
| GMD  | 5'-ACCCGAGGTCACCGTACAGCGTTGCG-3'      | 5'-ACGTTTCTCCTCGCCGAGGGCTTTCATGA-3' |
|      | 5'-TCATGAAAGCCCTCGGCGAGGAGAAAACGT-3'  | 5'-CGCAACGCTGTACGGTGACCTCGGGT-3'    |
| GMER | 5'-CCAATTAGCTGCCAAAGTCGGCGGTTTG-3'    | 5'-ACTGACGCAATGGCTTACCAGAACCCCA-3'  |
|      | 5'-TGGGGTCTGGTAAGCCATTGCGTCAGT-3'     | 5'-CAAACCGCCGACTTTGGCAGCTAAGTGG-3'  |
| GFT  | 5'-TCCGGTACTGCTAAGGCAGCTGCACA-3'      | 5'-TGTGCAGCTGCCTTAGCAGTACCGGA-3'    |
|      | 5'-GCGGATCAGCAGTTTATGCAGCTGTTTCGAC-3' | 5'-TCACATGACTAGGTAACAGCAGAGCTGCA-3' |

**C. Primers for RT-PCR amplification of CDS regions of gene transcripts**

| Gene | Forward primer                | Reverse primer                    |
|------|-------------------------------|-----------------------------------|
| GMD  | 5'-CTTGGCAATGAACAATAACGGTG-3' | 5'-TCAGACTAAATTGGGAAAGCAGATTG-3'  |
| GMER | 5'-TTCTAGGGCCTATATCCAGCAG-3'  | 5'-CTAGACACAACCTAGCACCGAATAG-3'   |
| GFT  | 5'-GTATAGAGCGTTGCCAATGAGG-3'  | 5'-CAAGTTATTAAGAAACCCATAGAGAGC-3' |

**D. Primers for real-time qPCR analyses of gene transcript expression, including the calibrator GAPDH used in RNAi experiments**

| Gene  | Forward primer                 | Reverse primer                |
|-------|--------------------------------|-------------------------------|
| GMD   | 5'-GCAATGAACAATAACGGTGTGAG-3'  | 5'-AGAACTCGGCCAAATAAGAGC-3'   |
| GMER  | 5'-GAAATTTTCGATCCGTCAAGCTG-3'  | 5'-ACCATCCGCTTTAGTTGTGTC-3'   |
| GFT   | 5'-AGTCTGTATCGCTAAATGCACC-3'   | 5'-ACATGACTAGGTAACAGCAGAG-3'  |
| ATPsf | 5'-GAATACAATGCACGAGTACATGG-3'  | 5'-CTACGTGAAAACCACTCACTG-3'   |
| GroES | 5'-AAGTCGTAAGTGGACGAAAATGAG-3' | 5'-GGACTAGATCTAAAACACCGGTC-3' |

**E. BamHI (ggatcc)/EcoRI (gaattc)-tagged primers for preparation of GMD and GMER expression constructs (gene-specific sequences underlined)**

| Gene | Forward primer (BamHI-tagged)                       | Reverse primer (BamHI/EcoRI-tagged)                   |
|------|-----------------------------------------------------|-------------------------------------------------------|
| GMD  | 5'-cctgggatcc <u>ATGAACAATAACGGTGTGAGTTGTG</u> -3'  | 5'-acctggaattc <u>GCAGATTGAAAGTTAGTTAAACAGGAG</u> -3' |
| GMER | 5'-cctgggatcc <u>ATGGAAACCACTGTATTAGTTACAGG</u> -3' | 5'-cctgggatcc <u>CTAGACACAACCTAGCACCGAATAG</u> -3'    |
